# Supplementary material for: Factors Influencing Wait and Watch Management for Primary Chronic Subdural Hematoma: A Retrospective Case–control Study
Source: Research Square preprint supplement (doi:10.21203/rs.3.rs-1538542/v1), 2022-04-27
Supplement: Supplementary file 1 [file 90af305c2133b2cc92350744.docx]

**Supplementary Table 1** Glasgow Coma Scale and Markwalder’s Grading Scale.

| **Patient’s Grade** | **Glasgow Coma Scale** | **Markwalder’s Grading Scale** |
| --- | --- | --- |
| Grade 0 | Glasgow Coma Scale score of 15 | Normal neurological status without any symptoms |
| Grade 1 | Glasgow Coma Scale score of 15 | Without neurological deficits, but with symptoms such as headache or unsteady gait |
| Grade 2 | Glasgow Coma Scale score of 13 to 14 | Focal neurological deficits, such as drowsiness or disorientation, or variable neurological deficits, such as hemiparesis |
| Grade 3 | Glasgow Coma Scale score of 9 to 12 | With stupor but appropriate responses to noxious stimuli and several focal neurological signs such as hemiplegia |
| Grade 4 | Glasgow Coma Scale score of less than 9 | Coma with absent motor responses to noxious stimuli and decerebrate or decorticate posturing |

**Supplementary Table 2** Outcome of Activities of Daily Life-the Barthel Index Scale.

| **Ability of Activity** | **Scores of Patients** | **Number of Patients (%)** | | ***P-*value** |
| --- | --- | --- | --- | --- |
| **Response** | **No response** |
| Eating | 0 | 0 | 1 (4.2) | 0.23 |
|  | 5 | 4 (10.3) | 4 (16.7) |  |
|  | 10 | 35 (89.7) | 19 (79.2) |  |
| Bathing | 0 | 8(20.5) | 5 (20.8) | 0.976 |
|  | 5 | 31(79.5) | 19 (79.2) |  |
| Cleaned | 0 | 3(7.7) | 4(16.7) | 0.275 |
|  | 5 | 36(92.3) | 20(83.3) |  |
| Cloth | 0 | 0 | 1 (4.2) | 0.231 |
|  | 5 | 8 (20.5) | 7(23.8) |  |
|  | 10 | 31 (79.5) | 16 (74.6) |  |
| Defecating | 5 | 2 (5.1) | 5 (20.8) | 0.056 |
|  | 10 | 37 (94.9) | 19 (79.2) |  |
| Urinating | 5 | 1 (2.6) | 4 (16.7) | 0.046* |
|  | 10 | 38 (97.4) | 20 (83.3) |  |
| Using the toilet | 0 | 0 | 1 (4.2) | 0.633 |
|  | 5 | 5 (12.8) | 3 (12.5) |  |
|  | 10 | 34 (87.2) | 20 (85.7) |  |
| Transferring bed or chair | 0 | 0 | 1 (4.2) | 0.229 |
|  | 5 | 2 (5.1) | 2 (8.3) |  |
|  | 10 | 9 (23.1) | 7 (29.2) |  |
|  | 15 | 28 (71.8) | 14 (58.3) |  |
| Walking 45 meters | 0 | 1 (2.6) | 1 (4.2) | 0.401 |
|  | 5 | 1 (2.6) | 3 (12.5) |  |
|  | 10 | 8 (20.5) | 4 (16.7) |  |
|  | 15 | 29 (74.4) | 16 (66.7) |  |
| Upstairs and downstairs | 0 | 4 (10.3) | 3 (12.5) | 0.912 |
|  | 5 | 15 (38.5) | 8 (36.5) |  |
|  | 10 | 20 (51.3) | 13 (52.4) |  |

Cleaned: to complete facing, hairing, brushing teeth, shaving, and other personal hygiene; Clothing: lining buckle, zippering and shoeing, etc.; using the toilet: to wipe, sort clothes, and flush.
